# Supplementary material for: Elevating Air Temperature May Enhance Future Epidemic Risk of the Plant Pathogen Phytophthora infestans
Source: MDPI journal article supplement (doi:10.3390/jof8080808), 2022-07-30
Supplement: s1 [file s1]

Table S1 Geographic coordinate, annual mean temperature (AMT) and annual accumulative rainfall (AAR) in the seven locations sampled for *Phytophthora infestans*.

| Population | Altitude(m) | Longitude | Latitude | Area(km <sup>2</sup> ) | AMT (°C) | AAR (mm) |
|------------|-------------|-----------|----------|------------------------|----------|----------|
| Ningxia    | 1778        | 106°14'   | 36°01'   | 10523                  | 7.00     | 300      |
| Gansu      | 2089        | 105°43'   | 34°35'   | 14277                  | 11.70    | 500      |
| Guizhou    | 1330        | 105°56'   | 26°16'   | 9267                   | 14.70    | 851      |
| Yunnan     | 2677        | 102°43'   | 25°03'   | 21013                  | 15.60    | 1100     |
| Xiapu      | 31          | 119°59'   | 26°54'   | 13433                  | 20.30    | 1450     |
| Fuzhou     | 10          | 119°17'   | 26°05'   | 12255                  | 20.50    | 1400     |
| Guangxi    | 78          | 108°22'   | 22°50'   | 22245                  | 22.60    | 1750     |

Table S2 Analysis of variance (ANOVA) for adaptation to aggressiveness among the *Phytophthora infestans* populations sampled from seven locations in China.

| Source                 | DF  | Sum of squares | Mean square | <i>F</i> value | <i>P</i> |
|------------------------|-----|----------------|-------------|----------------|----------|
| Population             | 6   | 2826.07        | 471.01      | 22.15          | <0.0001  |
| Isolates               | 133 | 28855.43       | 216.96      | 10.2           | <0.0001  |
| Temperature            | 4   | 97333.27       | 24333.32    | 1144.06        | <0.0001  |
| Isolates*temperature   | 532 | 66367.79       | 124.75      | 5.87           | <0.0001  |
| Population*temperature | 24  | 8879.72        | 369.99      | 17.4           | <0.0001  |
